# Supplementary material for: S-glutathionylation proteome profiling reveals a crucial role of a thioredoxin-like protein in interspecies competition and cariogenecity of Streptococcus mutans
Source: PLoS Pathog. 2020 Jul 27;16(7):e1008774. doi: 10.1371/journal.ppat.1008774 (PMC7410335; doi:10.1371/journal.ppat.1008774)
Supplement: S8 Table — (XLSX) [file ppat.1008774.s011.xlsx]

## Sheet: Sheet1
Primer_accession	Sequence	Description
smu_267c_upF	GGTCCAACACCAGATCCGAT	Construction of gshAB knockout cassette
smu_267c_upR	GAGTGTTATTGTTGCTCGG AGGCTGCCTCGCTTCATTGT
smu_267c_dnF	GGTATACTACTGACAGCTTC TTATTATTGCATAGGCTTCCT
smu_267c_dnR	AAGCCAATTGCCATTCAGGA
smu_267c_updnR	AGGAAGCCTATGCAATAATAA AGGCTGCCTCGCTTCATTGT
smu_267c_checkF	TAGGCTTTGCAGACACCAAC
smu_267c_checkR	GCAGGCAGAGGTTGGCGAA
smu_1296_upF	ATCTTAGCACCAGCTTCA	Construction of gsT knockout cassette
smu_1296_upR	GAGTGTTATTGTTGCTCGG CGTTTCTCCTTTCAAATT
smu_1296_dnF	GGTATACTACTGACAGCTTC AAATAAGAGTCAATCCTT
smu_1296_dnR	AGAATTGGCACCACTTGCT
smu_1296_updnR	AAGGATTGACTCTTATTT CGTTTCTCCTTTCAAATT
smu_1296_checkF	TTGGAGACAGTACGGTTA
smu_1296_checkR	AATGTCCTCATTTTCTGC
smu_1788c_upF	TGCTCCAACAGACCTTCACA	Construction of tlp-C41A site direct mutation
smu_1788c_upR	GAGTGTTATTGTTGCTCGG AGCAAAACGCTGAGCGTAAGGAGCA
smu_1788c_dnF	GGTATACTACTGACAGCTTC CGGGGCTTTTAGTTGCTCAA
smu_1788c_dnR	CTTCCGGCGTTTGATCAGTT
smu_1788c_updnR	TGCTCCTTACGCTCAGCGTTTTGCT
smu_1788c_checkF	GGTGACGATGCGGACAGTAT
smu_1788c_checkR	GCGTCCATTGCCATCCATAA
